# Supplementary material for: Adsorption of imidazolium-based ionic liquids with different chemical structures onto various resins from aqueous solutions
Source: Royal Society of Chemistry journal article supplement (doi:10.1039/c5ra04191k), 2015-01-01
Supplement: c5ra04191k1.pdf [file c5ra04191k1.pdf]

Supporting information for

## Adsorption of imidazolium-based ionic liquids with different chemical structures onto various resins from aqueous solutions

Luyang Li <sup>a</sup>, Yu Wang <sup>a</sup>, Xinhua Qi <sup>b,\*</sup>

<sup>a</sup> College of Environmental Science and Engineering, Nankai University, Tianjin 300071, China

<sup>b</sup> Agro-Environmental Protection Institute, The Ministry of Agriculture, Tianjin 300191, China

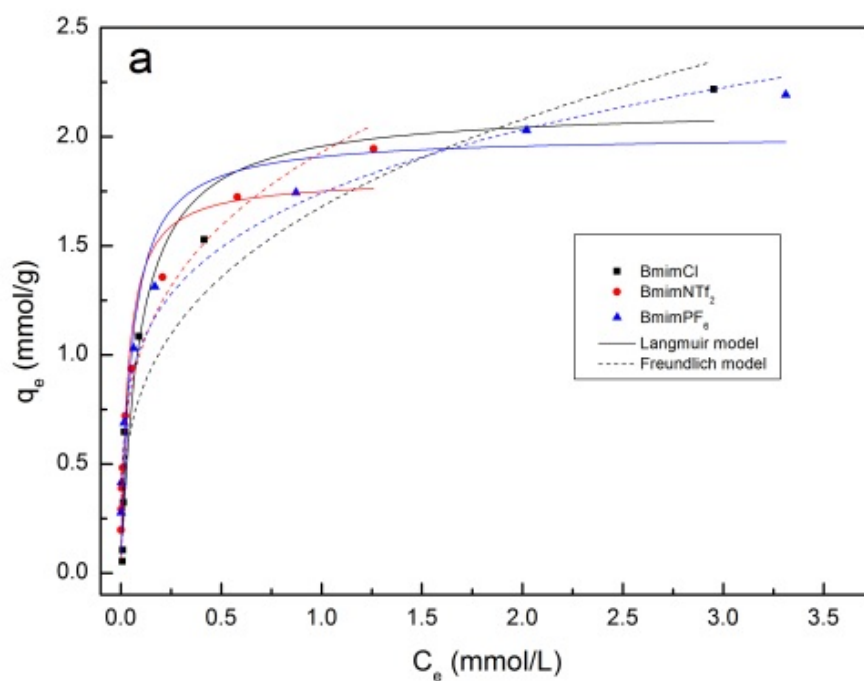

\* Corresponding author. Address: Agro-Environmental Protection Institute, The Ministry of Agriculture, Tianjin 300191, China. Email: [qixinhua@nankai.edu.cn](mailto:qixinhua@nankai.edu.cn) (X. Qi); Tel (Fax): 86-22-2350-8807.

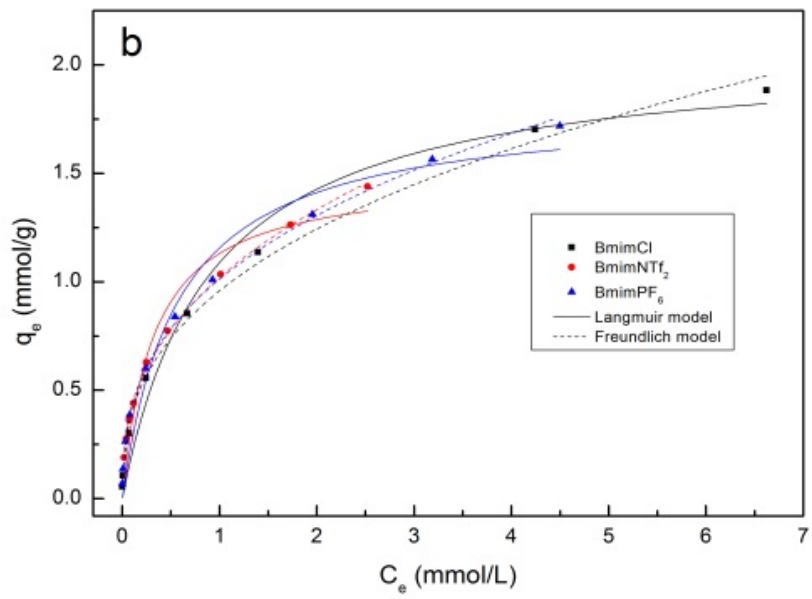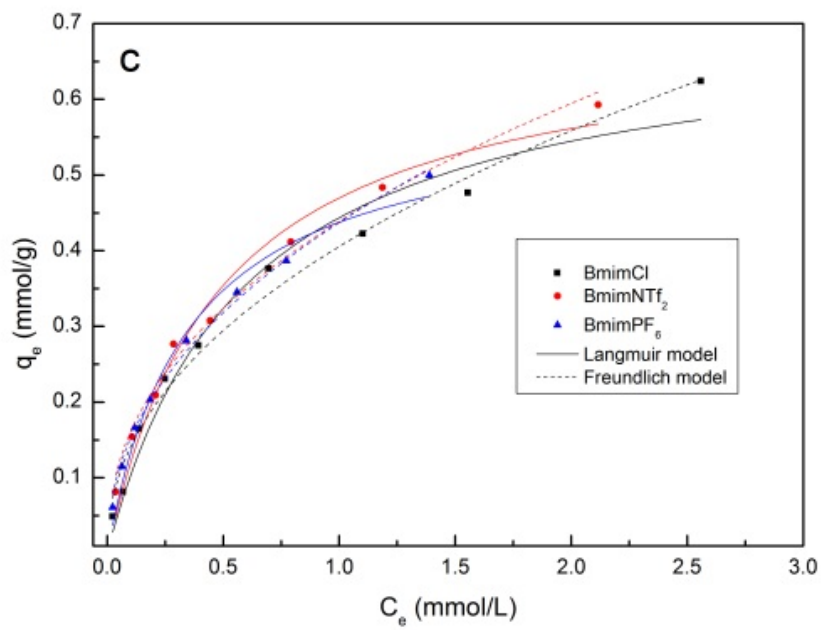

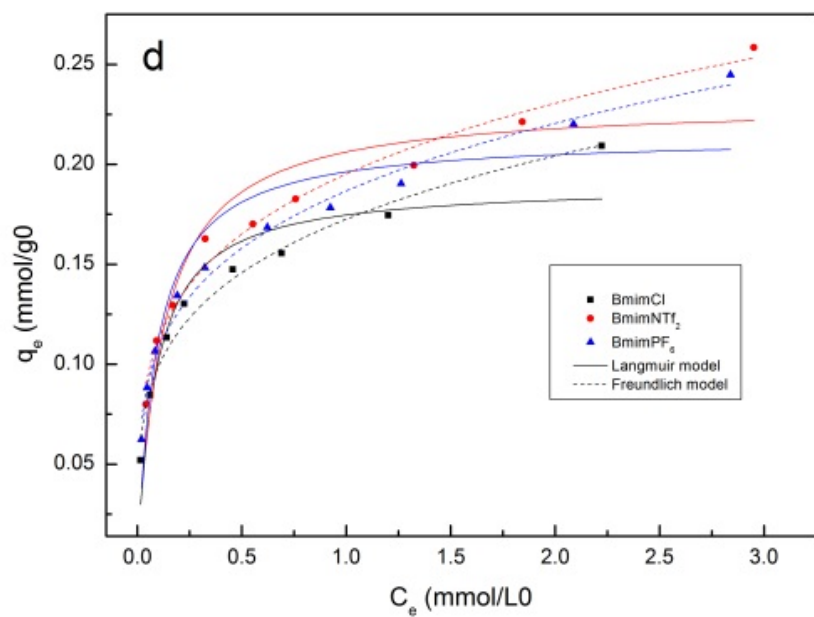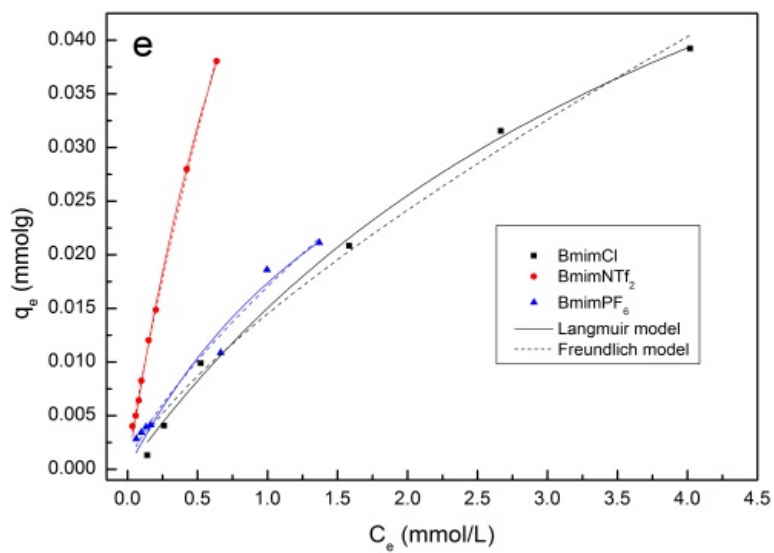

Figure S1. Adsorption isotherms of Bmim<sup>+</sup> ILs with different anions onto (a)NKC-9, (b)001×7, (c)110, (d)D113, (e)NKA-9.
